# Supplementary material for: X-ray induces mechanical and heat allodynia in mouse via TRPA1 and TRPV1 activation
Source: PubMed Central journal article supplement — Mol Pain. 2019 May 9;15:1744806919849201. doi: 10.1177/1744806919849201 (PMC6509987; doi:10.1177/1744806919849201), 2019-05-09
Supplement: Supplemental_Material1.pdf [file Supplemental_Material1.pdf]

**Supplementary Table.1. Information of Reagents used in present study**

| Reagent                                   | Company                      | Cat.No.   | Dilution                |
|-------------------------------------------|------------------------------|-----------|-------------------------|
| HC-030031                                 | MedChemExpress               | HY-15064  | /                       |
| HC-067047                                 | MedChemExpress               | HY-100208 | /                       |
| Capsazepine                               | MedChemExpress               | HY-15640  | /                       |
| Mouse anti-TrpV4                          | Millipore                    | MABS466   | 1:5000 (WB)             |
| Rabbit anti-TrpV1                         | Alomone                      | ACC-029   | 1:50 (IHC), 1:200 (WB)  |
| Rabbit anti-TrpA1                         | Alomone                      | ACC-037   | 1:100 (IHC), 1:200 (WB) |
| IB4                                       | Thermo Fisher                | I21411    | 1:400                   |
| p-ERK                                     | Cell Signaling<br>Technology | 4370      | 1:1500 (WB)             |
| Mouse anti-P-JNK                          | Cell Signaling<br>Technology | 9255      | 1:2000 (WB)             |
| Rabbit anti-GAPDH                         | Affinity                     | AF7021    | 1:2000 (WB)             |
| Invitrogen Goat<br>anti-Rabbit IgG        | Thermo Fisher                | A16110    | 1:5000 (WB)             |
| Invitrogen Goat<br>anti-Mouse IgG         | Thermo Fisher                | A16078    | 1:5000 (WB)             |
| Goat anti-Rabbit IgG<br>(Alexa Fluor 647) | Thermo Fisher                | A27040    | 1:2000 (IHC)            |
