# Supplementary material for: X-ray induces mechanical and heat allodynia in mouse via TRPA1 and TRPV1 activation
Source: PubMed Central journal article supplement — Mol Pain. 2019 May 9;15:1744806919849201. doi: 10.1177/1744806919849201 (PMC6509987; doi:10.1177/1744806919849201), 2019-05-09
Supplement: Supplemental_Material2.pdf [file Supplemental_Material2.pdf]

**Supplementary Data Table.2. Primers used in qPCR**

| <b>Name</b>  | <b>Forward(5'→3')</b>    | <b>Reverse(5'→3')</b>     | <b>Length</b> |
|--------------|--------------------------|---------------------------|---------------|
| TrpA1        | GATGTCCACGTGTGCCAAAG     | ACCTGAAAATGCTGCCTGGT      | 121           |
| TrpV1        | ACCACGGCTGCTTACTATCG     | GCTGGAATCCTCGGGTGTAG      | 337           |
| TrpV4        | TCCTTCTACATCAACGTGGTCTC  | CACTGTGGTCCGGTAAGGGTAG    | 111           |
| TrpM8        | GCTGTGGCCTCGTATCATT      | GAGCAGCACATAGGCAAACA      | 155           |
| NaV1.7       | TGGATCAGAATCCGCAGGTG     | TTTCCCCTTCGGATCCTTACC     | 82            |
| NaV1.8       | ATGACGGGGAGGTGAACAAC     | AACTGGTAATGGCCCCGACTG     | 84            |
| iNOS         | TTTGCTTCCATGCTAATGCGAAAG | GCTCTGTTGAGGTCTAAAGGCTCCG | 599           |
| SOD          | TATGGGGACAATACACAAGGCT   | CCACCATGTTTCTTAGAGTGAGG   | 71            |
| CAT          | TGGCACACTTTGACAGAGAGC    | CCTTIGCCTTGGAGTATCTGG     | 114           |
| IL-1 $\beta$ | TGTAATGAAAGACGGCACACC    | TCTTCTTTGGGTATTGCTTGG     | 68            |
