# Supplementary figures and images for: X-ray induces mechanical and heat allodynia in mouse via TRPA1 and TRPV1 activation
Source: PubMed Central journal article supplement — Mol Pain. 2019 May 9;15:1744806919849201. doi: 10.1177/1744806919849201 (PMC6509987; doi:10.1177/1744806919849201), 2019-05-09

A

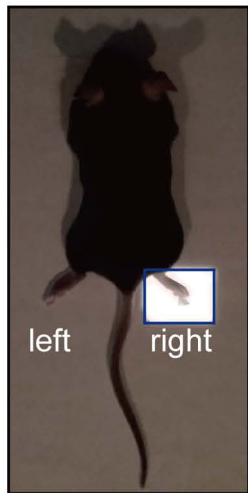

B

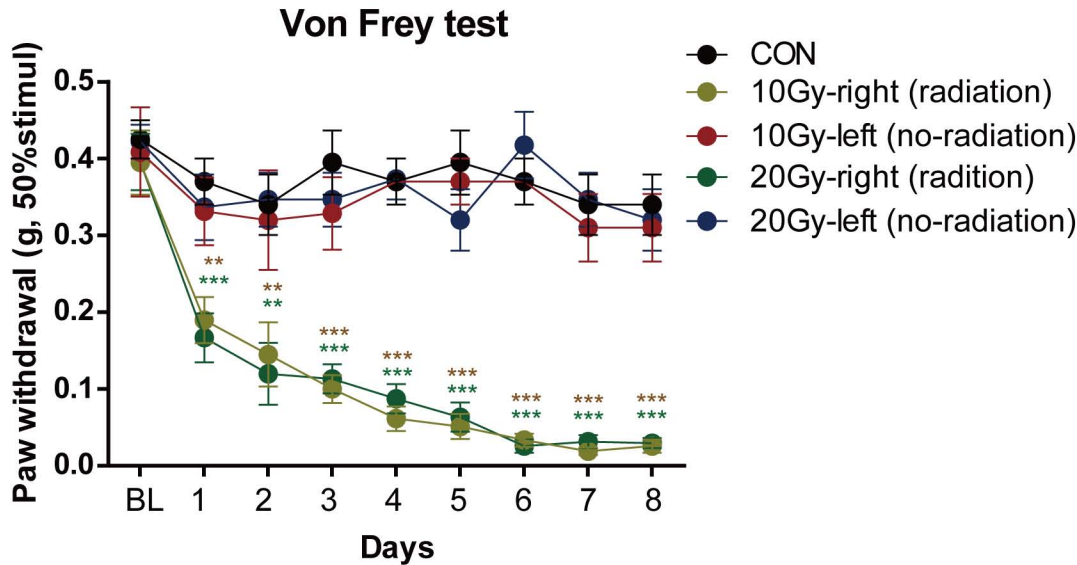

Supplement: Supplemental_Material3.pdf [file Supplemental_Material3.pdf]

A

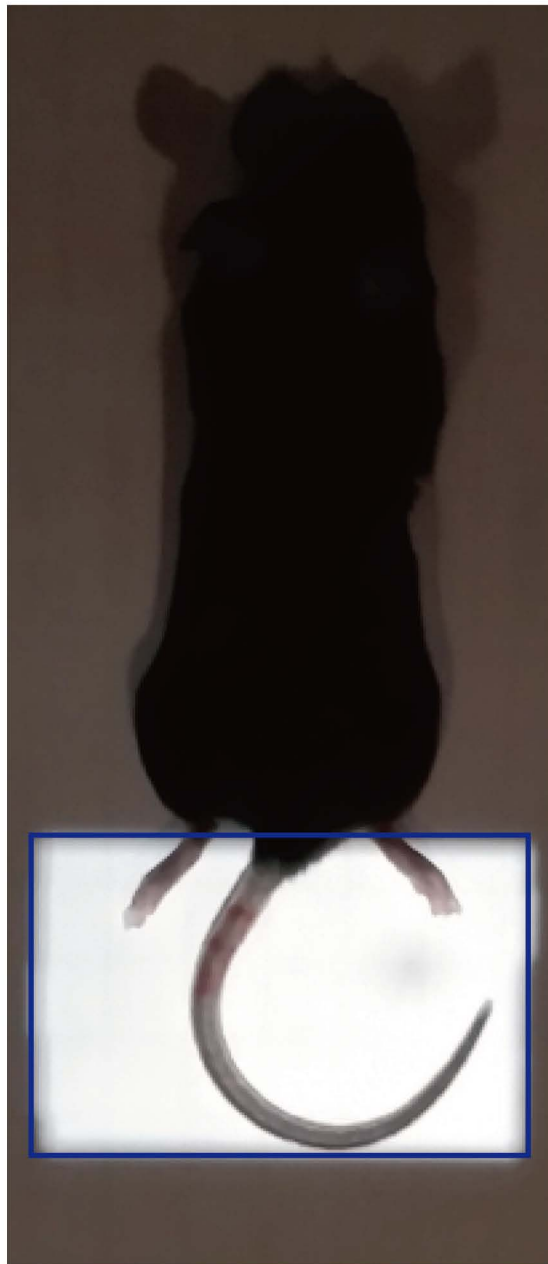

B

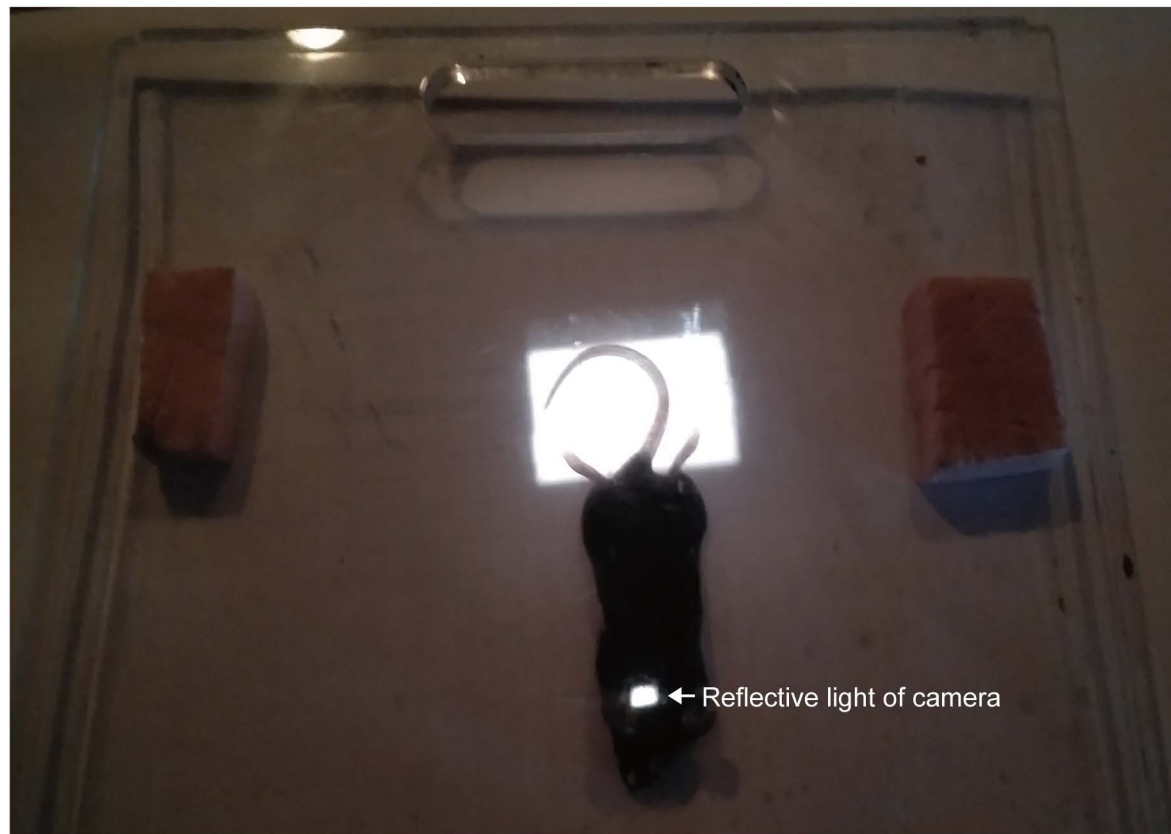

C

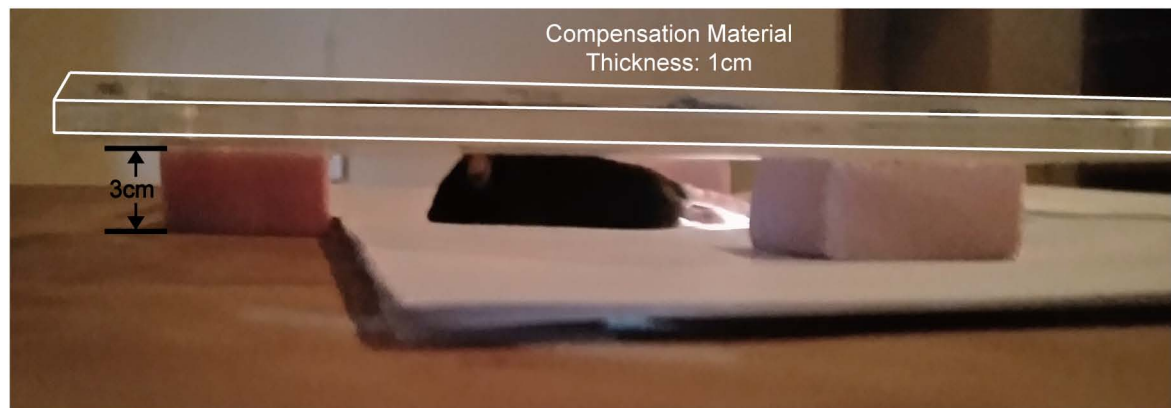

Supplement: Supplemental_Material4.pdf [file Supplemental_Material4.pdf]

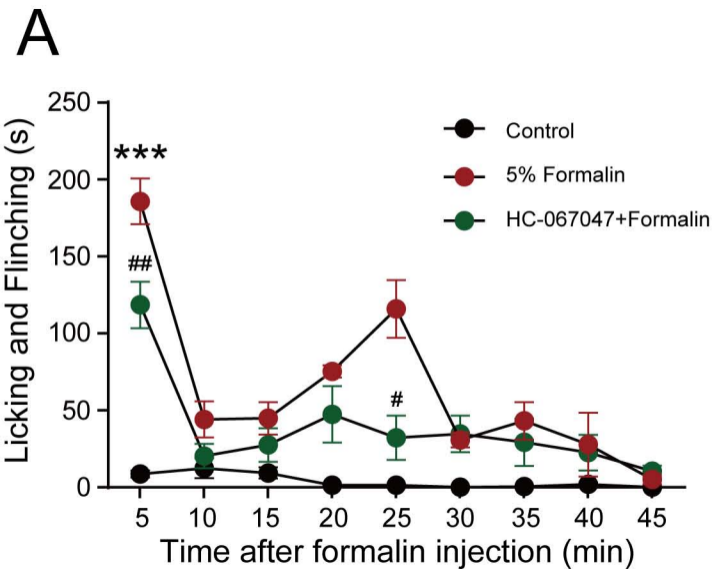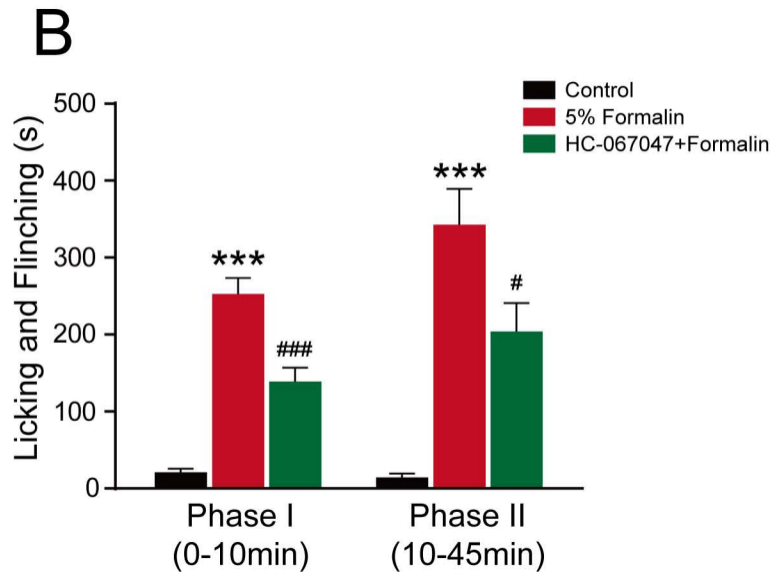

Supplement: Supplemental_Material5.pdf [file Supplemental_Material5.pdf]
